# Supplementary material
Source: HighWire-hosted journal article supplement (https://erj.ersjournals.com/content/58/1/2000221)
Supplement: inline-supplementary-material-5 [file inline-supplementary-material-5.xlsx]

## Sheet: All-Cell-Type-found
gene	D04-D01 LogFC	fdr	D07-D01 LogFC	fdr	D10-D01 LogFC	fdr	D13-D1 LogFC	fdr	Cell-type
ACP5	0.351679	0.0988933	0.669319	0.00183014	1.2402	4.98803e-07	1.573	4.91272e-09	Immune
CTSB	0.277631	0.0299129	0.878158	4.81543e-08	0.955661	5.5221e-09	1.30768	6.29327e-12	Immune
NEU1	0.901434	2.48088e-07	1.11498	1.06771e-09	1.19794	1.11328e-10	1.27612	1.70442e-11	Immune
CAPG	0.241998	0.0212928	0.66066	1.97168e-07	0.971609	9.48599e-11	1.26253	3.02018e-13	Immune
CSTB	0.227545	0.0300445	0.66091	1.97168e-07	0.90679	3.35667e-10	1.17361	1.10012e-12	Immune
CTSS	0.294892	0.034218	0.532698	0.000232502	0.627278	2.3239e-05	0.959935	1.54267e-08	Immune
BCAT1	0.103051	0.457153	0.451842	0.000976109	0.641568	1.10988e-05	0.956871	9.78673e-09	Immune
ANPEP	0.4732	0.000264426	0.582076	1.0413e-05	0.723756	2.24471e-07	0.945214	1.1288e-09	Immune
CTSD	0.338496	0.00664578	0.687717	1.24347e-06	0.788606	8.11883e-08	0.937092	2.18269e-09	Immune
AIF1	-0.372653	0.00549774	-0.334127	0.00941436	-0.456548	0.00053081	-0.476309	0.000291293	Immune
NOP9	-0.0613279	0.488368	-0.246301	0.00386514	-0.40735	1.12986e-05	-0.424794	4.85395e-06	Immune
CEBPB	-0.28876	0.00558435	-0.245118	0.0136829	-0.243573	0.0125744	-0.34975	0.000531851	Immune
AGO1	-0.238858	0.000655348	-0.329429	6.81411e-06	-0.347402	2.08419e-06	-0.345801	1.74129e-06	Immune
CSTA	-0.239431	0.653476	0.183567	0.718535	-0.185877	0.704001	-0.344207	0.464284	Immune
ANKRD44	-0.354034	2.12495e-05	-0.373531	3.94156e-06	-0.416997	4.56496e-07	-0.34381	7.48335e-06	Immune
ARHGDIB	-0.226456	0.00574039	-0.335814	7.86743e-05	-0.326452	8.73581e-05	-0.337957	4.68153e-05	Immune
BST1	-0.243392	0.0669705	-0.0773783	0.561858	-0.185758	0.137691	-0.312661	0.013166	Immune
DOCK8	-0.463571	7.1458e-07	-0.451194	2.4347e-07	-0.454366	1.32545e-07	-0.312079	3.49966e-05	Immune
BIN2	-0.452168	0.00125724	-0.462966	0.000652859	-0.473137	0.00042612	-0.305246	0.015132	Immune
LZTR1	-0.0906587	0.276598	-0.266904	0.00138652	-0.265995	0.00121312	-0.304531	0.000258488	Immune
ARRB2	-0.413193	0.000161268	-0.39804	0.000139586	-0.374762	0.000226597	-0.293753	0.00233545	Immune
ATM	-0.186007	0.0115676	-0.0924354	0.189634	-0.252469	0.000552664	-0.269522	0.000234737	Immune
COTL1	-0.181159	0.0298915	-0.200816	0.0135297	-0.192387	0.0157044	-0.263301	0.00123148	Immune
MRC1	-0.0329743	0.771066	-0.0259395	0.80951	-0.207428	0.0342856	-0.25579	0.0092224	Immune
LYAR	0.146467	0.0235783	-0.0240856	0.715024	-0.116144	0.0564839	-0.255266	0.000104904	Immune
MPP1	-0.207832	0.0709695	-0.322686	0.00475543	-0.159883	0.140743	-0.210697	0.0510653	Immune
LY75	-0.264711	0.012455	-0.187883	0.0628211	-0.208145	0.036168	-0.20236	0.039097	Immune
DYRK1A	-0.118503	0.111068	-0.0678159	0.354812	-0.139579	0.048384	-0.142401	0.0415778	Immune
AP2S1	-0.0775636	0.35484	-0.09621	0.229963	-0.0848494	0.278909	-0.141517	0.0669449	Immune
CSK	-0.140179	0.00102652	-0.138322	0.000753456	-0.149655	0.000264754	-0.119587	0.00223038	Immune
NOP2	0.113239	0.171357	-0.0495131	0.550755	-0.141892	0.0702259	-0.114352	0.138722	Immune
MYO1F	-0.33302	0.00149215	-0.335767	0.000926366	-0.278312	0.0042114	-0.106264	0.253697	Immune
MAD1L1	0.00561218	0.922239	0.00693635	0.893357	-0.0539547	0.250771	-0.100804	0.0305858	Immune
DOCK2	-0.313425	0.00103794	-0.239324	0.00704109	-0.252431	0.00405729	-0.0885949	0.292148	Immune
CD44	0.000118211	0.99866	-0.0659707	0.427329	-0.0786701	0.324168	-0.0869881	0.267439	Immune
CASP1	-0.238099	0.000676206	-0.215574	0.00112707	-0.153118	0.0145762	-0.067148	0.271291	Immune
ACAD8	-0.258176	0.0017076	-0.228925	0.00340198	-0.232205	0.00259868	-0.0547912	0.460212	Immune
BZW2	0.243234	0.00688001	0.0921262	0.283906	-0.0189029	0.831309	-0.0437041	0.605673	Immune
APBB1IP	-0.130581	0.0450922	-0.00718058	0.916464	-0.0964944	0.115604	-0.0435974	0.478387	Immune
CTSC	-0.254621	0.0260902	-0.245835	0.0263861	-0.272234	0.0128858	-0.0329353	0.767271	Immune
CLYBL	-0.258554	0.00790635	-0.187147	0.0429073	-0.099771	0.270469	-0.0173624	0.855916	Immune
DDX6	-0.039661	0.463952	-0.0356821	0.498251	-0.0503072	0.315451	-0.0145638	0.778109	Immune
DOCK10	-0.137688	0.105797	-0.153226	0.0631245	-0.163208	0.0440709	0.0115777	0.891863	Immune
C12orf10	0.115	0.0885885	0.0876703	0.181527	0.0448038	0.49194	0.0188333	0.776414	Immune
LIMK1	-0.135082	0.137607	-0.180389	0.0407084	-0.0774021	0.372664	0.0202219	0.822929	Immune
DCUN1D1	0.0469492	0.598451	0.0414549	0.628534	0.0858311	0.283145	0.0359571	0.658544	Immune
ARHGAP25	-0.197109	0.0163884	-0.196216	0.0137192	-0.0887389	0.250224	0.0387069	0.620007	Immune
DIP2A	-0.0838602	0.16198	-0.0240731	0.695705	-0.00468925	0.939955	0.0412811	0.466768	Immune
EFHD2	-0.0928741	0.18557	-0.0893348	0.189335	-0.00862683	0.904678	0.0445774	0.50246	Immune
CD74	-0.184342	0.0849064	-0.237085	0.0230983	-0.104795	0.303084	0.0473994	0.64672	Immune
C1QC	0.203443	0.29874	0.132825	0.492574	0.0739905	0.698264	0.0596188	0.752009	Immune
CHMP7	0.148182	0.0820258	0.0156721	0.86081	0.0670452	0.410158	0.0614186	0.446911	Immune
C10orf76	-0.0172067	0.745348	-0.0378154	0.42791	0.011294	0.817133	0.0782962	0.0819661	Immune
LYN	0.0978412	0.20944	0.0483292	0.535181	0.0888057	0.2284	0.117905	0.104417	Immune
DTX3L	0.097429	0.189289	0.0408111	0.585544	0.0490371	0.492586	0.133919	0.0540134	Immune
ATG7	0.117942	0.0729289	0.0336642	0.613935	0.113398	0.0686175	0.16524	0.00853799	Immune
ACTR2	0.0323209	0.480367	0.127595	0.00388649	0.161208	0.000353432	0.167855	0.000191889	Immune
AMPD2	0.222994	0.000719767	0.242854	0.000169281	0.223616	0.000350395	0.177809	0.00288407	Immune
ARPC4	0.0417322	0.462859	0.196722	0.000542022	0.193149	0.000532442	0.192946	0.000469218	Immune
ARPC5	0.0226623	0.737151	0.123985	0.0373597	0.149785	0.0113038	0.195793	0.00117033	Immune
DTYMK	0.0979549	0.172801	0.0853712	0.221521	0.125989	0.0641652	0.21486	0.00214168	Immune
CNPY3	0.0277139	0.805288	0.0899117	0.369785	0.242058	0.0133267	0.223136	0.0202336	Immune
ARPC2	0.0278732	0.646361	0.127994	0.0207827	0.193319	0.000689098	0.230796	7.7983e-05	Immune
DIAPH1	0.168389	0.0739686	0.252141	0.00678713	0.229265	0.0115803	0.253223	0.00520144	Immune
NAGA	-0.00863455	0.946469	0.248336	0.0212292	0.236641	0.0249768	0.272743	0.0096516	Immune
CTSL	-0.0537368	0.687577	0.134245	0.264478	0.153814	0.187013	0.302274	0.0101432	Immune
ARPC1B	0.000526862	0.995816	0.189143	0.00285324	0.264478	6.80188e-05	0.30672	7.04933e-06	Immune
CHM	0.141663	0.0810296	0.137288	0.0801483	0.256937	0.00143022	0.316093	0.00013629	Immune
BTK	-0.0301771	0.784968	0.0177741	0.865498	0.187062	0.0497425	0.319665	0.00119331	Immune
MAP3K5	0.133611	0.108037	0.202805	0.0130039	0.238706	0.00341202	0.320945	0.000151849	Immune
MAPKAPK3	0.302111	0.000220069	0.294211	0.000169317	0.287821	0.000175889	0.332445	2.29965e-05	Immune
DMXL2	0.0932959	0.231256	0.174464	0.0210446	0.181844	0.0145932	0.343785	2.46426e-05	Immune
MYO9B	0.0835018	0.099283	0.230389	2.90926e-05	0.226864	2.71373e-05	0.354431	1.30183e-08	Immune
CFL1	0.190143	0.00262479	0.28347	2.00958e-05	0.339346	9.41572e-07	0.360579	2.48992e-07	Immune
NAGK	-0.00460732	0.952713	0.150405	0.0249764	0.279103	9.76498e-05	0.378434	9.6163e-07	Immune
CORO1C	0.14494	0.00750977	0.295152	1.57184e-06	0.36187	3.24498e-08	0.388449	5.61825e-09	Immune
CDCP1	0.268075	0.00403707	0.306107	0.00087389	0.340624	0.000228263	0.397319	2.71691e-05	Immune
CORO7	0.213276	0.000726618	0.359093	3.61193e-07	0.360819	2.09674e-07	0.420677	8.97559e-09	Immune
ARPC3	0.0875223	0.131961	0.248548	6.4078e-05	0.33823	4.89287e-07	0.426861	5.23295e-09	Immune
APOBR	-0.222494	0.0371089	0.0420016	0.700111	0.152068	0.129425	0.43599	7.03453e-05	Immune
MSR1	0.151805	0.161357	0.244132	0.0208631	0.272567	0.00919307	0.444806	6.91227e-05	Immune
LTA4H	0.020885	0.763771	0.131323	0.0320173	0.298744	1.1759e-05	0.447919	9.67172e-09	Immune
DECR1	0.131291	0.0476947	0.207234	0.00185823	0.349382	2.34844e-06	0.460421	1.40799e-08	Immune
CAP1	0.265046	0.000210535	0.417649	1.65333e-07	0.458609	1.85584e-08	0.479613	5.01587e-09	Immune
AMPD3	0.0879561	0.507019	0.167349	0.176119	0.364757	0.00348163	0.490744	0.00015546	Immune
CYP27A1	0.0773028	0.584863	0.262596	0.0423388	0.675702	4.51472e-06	0.927862	1.42213e-08	Immune
MANBA	0.263181	0.0570455	0.630003	2.7434e-05	0.74156	1.80987e-06	0.877493	7.62829e-08	Immune
MAN2B1	0.347934	0.000128318	0.661482	2.98667e-09	0.727916	2.15359e-10	0.869678	3.3109e-12	Immune
APOE	0.147121	0.356716	0.321217	0.0352742	0.560978	0.000425403	0.813411	2.54272e-06	Immune
MYO1G	0.0901906	0.531106	0.445858	0.00137959	0.507545	0.000306089	0.754037	1.03967e-06	Immune
CYBB	0.116889	0.367566	0.308487	0.0136829	0.492434	0.000177479	0.739842	3.85846e-07	Immune
ATP6V1F	0.236572	0.00940927	0.441363	9.45919e-06	0.65364	9.27884e-09	0.73623	6.11369e-10	Immune
C5AR1	0.170835	0.185245	0.189424	0.12821	0.436123	0.000732751	0.688264	1.5002e-06	Immune
MAN2B2	0.147809	0.238611	0.526893	7.54575e-05	0.593997	1.12141e-05	0.66106	1.74697e-06	Immune
ATP6V0D1	0.138088	0.0349006	0.340691	4.05499e-06	0.510836	2.57172e-09	0.65042	1.21658e-11	Immune
ACOT8	0.181791	0.00642612	0.370688	1.09326e-06	0.488231	5.80231e-09	0.612086	4.13613e-11	Immune
CCDC88A	0.0481677	0.572146	0.218556	0.00619194	0.312608	0.000168329	0.567417	1.18046e-08	Immune
CYBA	0.127843	0.30186	0.226771	0.0554971	0.402787	0.000985275	0.554554	1.84891e-05	Immune
CD163	0.404318	0.00573657	0.707689	8.65603e-06	0.506913	0.000444942	0.547915	0.000158196	Immune
ARAP1	0.241641	0.000819296	0.334606	9.07391e-06	0.3901	5.6637e-07	0.545452	8.86684e-10	Immune
CPVL	-0.516084	0.000788019	-0.54172	0.000291717	-0.555176	0.000175899	-0.546181	0.000182224	Immune
LMNB1	-0.421194	2.12871e-05	-0.466736	1.86647e-06	-0.519153	2.14994e-07	-0.584051	1.75503e-08	Immune
ALOX5	-0.366831	0.00463409	-0.633071	6.9586e-06	-0.611837	8.05284e-06	-0.646423	2.79668e-06	Immune
BAZ1A	-0.430742	7.73167e-05	-0.660769	5.97525e-08	-0.795594	1.04311e-09	-0.815317	4.05643e-10	Immune
CD274	-0.554522	1.32212e-06	-0.973056	1.16286e-11	-0.973747	5.25594e-12	-1.04395	6.14221e-13	Immune
CD14	-0.099702	0.50454	-0.438774	0.00234634	-0.875741	2.28847e-07	-1.05613	5.253e-09	Immune
CORO1A	-0.875391	9.19354e-09	-0.991731	8.48283e-11	-1.10011	5.25594e-12	-1.11992	1.74478e-12	Immune
CRIP1	-0.61069	0.000119856	-0.730209	5.56814e-06	-0.890026	1.5641e-07	-1.13329	1.19923e-09	Immune
MNDA	-0.808603	7.84968e-05	-1.07959	5.80794e-07	-1.20132	5.93791e-08	-1.27981	1.2229e-08	Immune
MMP14	1.25089	9.1618e-05	1.48874	4.16663e-06	2.07582	1.00854e-08	2.27315	1.12743e-09	Mesenchymal
ABCA6	-0.242919	0.0182032	-0.221421	0.0256517	-0.24654	0.0119908	-0.308708	0.0019185	Mesenchymal
MMP2	1.30555	1.29248e-06	1.71116	2.98667e-09	2.00682	6.50791e-11	2.10871	1.26061e-11	Mesenchymal
ABI3BP	-0.098644	0.561019	0.279693	0.0716928	-0.0789582	0.612919	-0.0798867	0.605399	Mesenchymal
ADAMTSL3	-0.221812	0.0954498	-0.358389	0.00644294	-0.336423	0.00890867	-0.402133	0.00195959	Mesenchymal
ANGPTL2	1.08688	5.83891e-08	1.588	8.64796e-12	1.72382	7.62751e-13	1.67106	5.25373e-13	Mesenchymal
C1S	1.04082	0.000176697	1.39136	1.73017e-06	1.3368	2.17892e-06	1.54231	1.49225e-07	Mesenchymal
MFGE8	0.25607	0.0244179	0.916915	2.77968e-09	1.21005	5.90962e-12	1.35195	3.45107e-13	Mesenchymal
AKT3	0.0058305	0.949972	-0.0416283	0.612198	-0.0414781	0.598215	-0.055117	0.471586	Mesenchymal
ALDH1A3	0.219595	0.210359	0.441219	0.0103204	0.248516	0.131715	0.156452	0.340388	Mesenchymal
ALDH1L2	-0.284585	0.0508281	-0.0756195	0.608062	0.0184709	0.902012	0.208673	0.12394	Mesenchymal
AEBP1	0.0166884	0.897142	0.311965	0.00524526	0.116306	0.277195	0.115113	0.274893	Mesenchymal
DFNA5	0.482306	0.00149924	0.858175	5.36422e-07	1.11187	3.43727e-09	1.30832	8.57148e-11	Mesenchymal
ANO6	-0.262108	0.00749879	-0.318414	0.00108568	-0.270645	0.00393394	-0.236197	0.00985416	Mesenchymal
BMP1	0.517453	4.01422e-05	1.01295	2.57594e-10	1.00887	1.21706e-10	1.20213	1.89698e-12	Mesenchymal
C1R	0.753361	1.49359e-05	1.1413	6.66714e-09	1.03689	1.95036e-08	1.17725	1.11651e-09	Mesenchymal
AOX1	-0.444744	0.000554474	0.0332356	0.789883	-0.0705323	0.542627	-0.0583209	0.612277	Mesenchymal
MXRA8	0.728141	0.00570711	0.851925	0.00107885	1.13307	3.23197e-05	1.11816	3.14456e-05	Mesenchymal
ANK2	-0.429909	0.000139335	-0.331801	0.00129332	-0.372878	0.000325504	-0.348666	0.000578413	Mesenchymal
MME	0.0205821	0.934474	0.211455	0.314768	0.755951	0.000488092	1.06581	4.71446e-06	Mesenchymal
ARVCF	0.081907	0.353932	0.0806271	0.345967	0.113424	0.166726	0.154624	0.0577754	Mesenchymal
DDR2	0.154787	0.481742	0.337693	0.101345	0.858304	0.000105609	1.02187	8.09077e-06	Mesenchymal
ASPN	-0.157027	0.357261	0.203015	0.213528	-0.0866262	0.596065	-0.337512	0.0326725	Mesenchymal
ATL1	-0.134475	0.0250185	-0.134431	0.0208193	-0.0683583	0.226453	-0.0605086	0.277992	Mesenchymal
ARHGEF10L	-0.330344	0.0155884	-0.210763	0.106414	-0.293829	0.0229763	-0.168597	0.180665	Mesenchymal
ANTXR1	0.539185	0.00729048	0.600296	0.00234168	0.89169	2.25763e-05	0.907756	1.40855e-05	Mesenchymal
BAG2	-0.199892	0.0142751	-0.241018	0.0028083	-0.273771	0.000715735	-0.425003	1.89813e-06	Mesenchymal
BGN	-0.000736363	0.996939	0.266216	0.0652273	0.0778387	0.59212	-0.051197	0.725048	Mesenchymal
CYP1B1	0.348557	0.263603	0.385348	0.200307	0.6785	0.0220079	0.833677	0.00509132	Mesenchymal
BMP5	-0.109881	0.459185	-0.317655	0.0238796	-0.253092	0.0642443	-0.330318	0.0157392	Mesenchymal
C3	-0.223309	0.139092	-0.155866	0.291178	-0.41585	0.00470585	-0.401305	0.00560091	Mesenchymal
C7	-0.156888	0.151408	-0.120107	0.259223	-0.196261	0.0580733	-0.160587	0.115189	Mesenchymal
LRP1	0.413836	0.000145123	0.612884	2.57665e-07	0.615231	1.49287e-07	0.596779	1.78256e-07	Mesenchymal
CACNA2D1	-0.286828	0.0401189	-0.190868	0.157253	-0.292717	0.0276435	-0.392578	0.0035488	Mesenchymal
CALB2	0.0488664	0.583605	0.0140751	0.872503	0.0686465	0.392294	0.0212578	0.796499	Mesenchymal
MAP1B	0.476473	0.00644047	0.748951	4.66348e-05	0.656942	0.000183238	0.591764	0.000503253	Mesenchymal
CAPN5	0.0399769	0.606919	0.120033	0.0893827	0.140449	0.0434535	0.0398261	0.568995	Mesenchymal
MTHFD1L	0.22755	0.00947185	0.28522	0.00110365	0.352019	8.77773e-05	0.561441	4.78345e-08	Mesenchymal
CTSF	0.0776301	0.523848	0.366521	0.00186769	0.415871	0.000451422	0.550752	1.06773e-05	Mesenchymal
CDH11	-0.237051	0.0387531	-0.226431	0.0409559	-0.208222	0.0546947	-0.235232	0.0289737	Mesenchymal
NNT	0.0579636	0.385682	0.202453	0.0021159	0.340016	3.12496e-06	0.504098	2.21843e-09	Mesenchymal
CHRDL1	-0.11226	0.674752	-0.0993058	0.695893	-0.298743	0.201451	-0.281086	0.223662	Mesenchymal
CEMIP	0.177984	0.22919	0.166331	0.24509	0.308419	0.0281011	0.213869	0.119395	Mesenchymal
CES1	-0.342296	0.0181148	-0.360186	0.0106866	0.028985	0.840854	0.128485	0.3401	Mesenchymal
LUM	-0.253616	0.101721	0.0985974	0.526859	-0.241308	0.100092	-0.500569	0.00104849	Mesenchymal
CFH	-0.0943734	0.562105	-0.107709	0.483301	-0.323068	0.027988	-0.310744	0.0322747	Mesenchymal
COL6A6	-0.180572	0.114415	-0.380093	0.00107921	-0.395988	0.000590302	-0.51512	2.02262e-05	Mesenchymal
COLEC12	-0.1046	0.570649	-0.0281266	0.877269	-0.100812	0.550729	-0.208411	0.200196	Mesenchymal
CDH13	-0.292469	0.0681594	-0.381158	0.0150783	-0.364731	0.0176084	-0.535712	0.000734181	Mesenchymal
CPA3	-0.263398	0.0471288	-0.128105	0.324775	-0.34604	0.00702942	-0.327345	0.00954136	Mesenchymal
CRISPLD2	0.199356	0.248381	0.0316472	0.86078	0.0694888	0.681931	-0.131899	0.416474	Mesenchymal
COL12A1	-0.253658	0.0255337	-0.308686	0.0057375	-0.376741	0.000849816	-0.439431	0.000135567	Mesenchymal
MECP2	-0.214923	0.0533145	-0.265084	0.0148191	-0.318505	0.00343051	-0.535714	7.43715e-06	Mesenchymal
COL16A1	-0.247882	0.53864	0.0435376	0.914661	-0.317176	0.38817	-0.257991	0.479372	Mesenchymal
COL1A1	-0.139015	0.70827	0.33072	0.324375	-0.281504	0.387712	-0.434996	0.172592	Mesenchymal
COL1A2	0.0105537	0.971743	0.434457	0.0964201	-0.0958777	0.720829	-0.219355	0.389016	Mesenchymal
ARHGEF17	-0.270835	0.00620017	-0.291089	0.00260146	-0.412708	4.9909e-05	-0.537465	7.69926e-07	Mesenchymal
ARHGAP42	-0.266149	0.000723903	-0.435099	5.80794e-07	-0.535065	9.88956e-09	-0.553217	3.29612e-09	Mesenchymal
COL5A2	-0.110045	0.642084	0.13412	0.545838	-0.152568	0.473345	-0.212651	0.304836	Mesenchymal
COL6A1	-0.163869	0.22849	-0.116375	0.384141	-0.214822	0.093285	-0.350956	0.00679129	Mesenchymal
COL6A2	-0.140963	0.286896	-0.113469	0.381376	-0.191948	0.121337	-0.351153	0.00534852	Mesenchymal
COL6A3	-0.0693689	0.572146	0.0661822	0.572098	-0.0591022	0.600918	-0.198624	0.0678689	Mesenchymal
COL6A5	-0.228744	0.0898483	-0.522154	0.000213962	-0.445667	0.000946733	-0.571199	4.68153e-05	Mesenchymal
NID1	-0.291133	0.0476947	-0.476368	0.00132842	-0.511988	0.000539091	-0.576698	0.000120926	Mesenchymal
COL8A1	0.00621771	0.991626	0.327613	0.461219	0.0631278	0.890422	0.148927	0.732074	Mesenchymal
CRYAB	0.0278539	0.854527	0.301021	0.0214075	0.144888	0.25538	-0.0715144	0.577288	Mesenchymal
DPYSL3	-0.294527	0.00674066	-0.287246	0.00626293	-0.442822	6.85024e-05	-0.584505	9.41038e-07	Mesenchymal
MACF1	-0.365882	0.000212554	-0.467105	4.45757e-06	-0.559996	1.60445e-07	-0.630977	1.24215e-08	Mesenchymal
CSRP2	-0.531734	0.000111154	-0.406821	0.00115937	-0.374127	0.0021318	-0.440224	0.00037247	Mesenchymal
CSPG4	-0.202233	0.116162	-0.297657	0.0179355	-0.48325	0.000244798	-0.659576	3.00239e-06	Mesenchymal
CYR61	-0.0208001	0.924271	0.231037	0.207204	0.344043	0.0543056	0.339852	0.0545119	Mesenchymal
COL5A1	-0.483577	0.00484202	-0.409403	0.0123538	-0.624974	0.000245693	-0.686127	6.70826e-05	Mesenchymal
DBN1	0.559451	1.03389e-05	0.622631	7.08843e-07	0.501488	1.29536e-05	0.412039	0.000145395	Mesenchymal
DCN	-0.0454725	0.832218	0.290727	0.120248	-0.0759119	0.690207	-0.38349	0.0350901	Mesenchymal
MAMDC2	-0.412188	0.000615146	-0.443118	0.000164663	-0.550947	6.92653e-06	-0.686264	1.46775e-07	Mesenchymal
CALD1	-0.360518	0.0432676	-0.142437	0.419106	-0.444332	0.00963644	-0.707313	0.000103397	Mesenchymal
CORO2B	-0.295365	0.00609049	-0.42525	0.000126795	-0.533021	4.35915e-06	-0.717231	2.00648e-08	Mesenchymal
DIP2C	-0.322235	0.00418334	-0.317212	0.00349325	-0.305112	0.00415199	-0.244193	0.0178664	Mesenchymal
CYB5R2	-0.196196	0.148884	-0.111569	0.406611	-0.151982	0.238191	-0.275759	0.0310986	Mesenchymal
CYGB	0.107784	0.173206	0.303671	0.000234279	0.280187	0.000464023	0.214694	0.004806	Mesenchymal
EFEMP1	-0.437525	0.000987324	-0.357822	0.00396927	-0.641611	3.56502e-06	-0.782083	9.87099e-08	Mesenchymal
ECM1	0.258315	0.0762781	0.422416	0.00363794	0.315737	0.0235525	0.289865	0.0345701	Mesenchymal
A2M	-0.744806	3.00421e-06	-0.941726	1.83263e-08	-0.858884	4.51722e-08	-0.784394	1.54052e-07	Mesenchymal
COL14A1	-0.247876	0.413397	0.416882	0.145959	-0.213814	0.451138	-0.827091	0.00379409	Mesenchymal
DST	-0.155729	0.061767	-0.15494	0.0544077	-0.166099	0.0361632	-0.139782	0.0728337	Mesenchymal
MAOB	-0.441749	7.24601e-05	-0.650252	1.07027e-07	-0.671657	3.41399e-08	-0.837939	3.44226e-10	Mesenchymal
COL3A1	-0.160026	0.626264	-0.0557896	0.862582	-0.827906	0.00576158	-0.851232	0.00419294	Mesenchymal
NOTCH2	-0.0459937	0.77706	0.0865937	0.558483	0.348678	0.0138616	0.467163	0.00124906	Mesenchymal
NOTCH3	-0.203055	0.133061	-0.183546	0.161129	-0.275173	0.0325442	-0.2124	0.0927067	Mesenchymal
LTBP1	0.178429	0.383008	0.507765	0.0101817	0.144389	0.453798	0.200378	0.286545	Mesenchymal
LTBP2	-0.37596	0.0188304	-0.26904	0.0792518	-0.422051	0.00618261	-0.446857	0.00357006	Mesenchymal
DMD	-0.504659	0.0454611	-0.121473	0.636432	-0.519035	0.0303676	-0.877386	0.000470997	Mesenchymal
AKAP12	-0.579448	0.000844769	-0.540393	0.00107885	-0.679614	6.72572e-05	-0.895246	9.41204e-07	Mesenchymal
DAAM2	-0.530239	1.03389e-05	-0.657729	1.2762e-07	-0.766132	4.50321e-09	-0.911739	9.15449e-11	Mesenchymal
MYL9	-0.492104	0.0307126	-0.231722	0.296253	-0.518138	0.0171292	-0.932614	6.73916e-05	Mesenchymal
MOCS1	-0.1333	0.187331	0.0497463	0.628474	0.0504723	0.606923	-0.0692069	0.468738	Mesenchymal
LDB3	-0.640435	0.0177656	-0.379175	0.143677	-0.504957	0.0470345	-0.987004	0.00025513	Mesenchymal
NEXN	-0.62221	0.00035609	-0.707664	4.37778e-05	-0.890939	1.06369e-06	-0.994207	1.20912e-07	Mesenchymal
AOC3	-0.417969	0.0070416	-0.647011	6.67414e-05	-0.771259	4.26138e-06	-1.00344	3.68584e-08	Mesenchymal
MYLK	-0.663873	9.88408e-05	-0.616769	0.000128985	-0.839953	1.22145e-06	-1.00494	3.99429e-08	Mesenchymal
CNN1	-0.582193	0.0766632	0.100102	0.7695	-0.464957	0.133958	-1.00818	0.00171903	Mesenchymal
ABCA8	-0.706019	9.61824e-06	-0.765022	9.70813e-07	-0.985175	7.67642e-09	-1.07988	8.45804e-10	Mesenchymal
ADARB1	-0.644185	1.45241e-06	-0.836913	4.40172e-09	-0.936856	2.22903e-10	-1.1141	3.90771e-12	Mesenchymal
MRVI1	-0.661196	0.0035059	-0.448391	0.0348986	-0.818778	0.000252327	-1.1214	2.97208e-06	Mesenchymal
MOXD1	-0.58028	0.000646317	-0.416417	0.00772663	-0.319595	0.034	-0.288698	0.0520337	Mesenchymal
MRC2	-0.13715	0.360008	0.0859178	0.561858	-0.158308	0.2579	-0.254267	0.06553	Mesenchymal
MYH11	-0.469872	0.146827	-0.05168	0.878434	-0.465625	0.127211	-1.16845	0.000323543	Mesenchymal
NPNT	-0.21211	0.451517	-0.269612	0.315287	-0.368765	0.152976	-0.25066	0.328976	Mesenchymal
MYH10	-0.537733	0.00294703	-0.601862	0.000731873	-0.918373	2.41438e-06	-1.19083	1.98589e-08	Mesenchymal
LPP	-0.303257	0.0402137	-0.150457	0.297177	-0.321523	0.022648	-0.49694	0.000672519	Mesenchymal
ASPA	-0.653008	9.34454e-05	-0.896033	4.60395e-07	-0.994408	4.87289e-08	-1.22271	6.61788e-10	Mesenchymal
NID2	-0.0918111	0.416037	-0.123732	0.248564	-0.166507	0.109912	-0.290938	0.00596881	Mesenchymal
MFAP4	-0.290863	0.0201545	-0.172706	0.151108	-0.227295	0.0536609	-0.336768	0.00481365	Mesenchymal
ADH1B	-0.606289	7.4222e-05	-0.826602	3.71285e-07	-0.958199	1.82797e-08	-1.29579	3.14514e-11	Mesenchymal
LSAMP	-0.879225	3.70518e-08	-1.18632	1.5164e-11	-1.26039	2.56642e-12	-1.2985	5.49911e-13	Mesenchymal
NKRF	-0.101236	0.0855273	-0.265187	3.27837e-05	-0.435106	7.49215e-09	-0.42214	8.35485e-09	Mesenchymal
DES	-0.428481	0.0978529	-0.0342192	0.89947	-0.670591	0.00752116	-1.31912	3.27361e-06	Mesenchymal
CA3	-0.635497	0.000936095	-0.776581	5.89656e-05	-1.06119	4.09465e-07	-1.46908	7.4252e-10	Mesenchymal
NCKIPSD	-0.048114	0.655667	-0.0428503	0.677278	-0.104076	0.275508	-0.160505	0.0876212	Mesenchymal
CSRP1	-0.758938	0.000115687	-0.853396	1.2952e-05	-1.08446	2.05563e-07	-1.47565	4.65244e-10	Mesenchymal
LMOD1	-0.916085	0.00109246	-0.709588	0.00658462	-1.24228	1.33095e-05	-1.60764	1.6667e-07	Mesenchymal
CFD	-0.96551	4.58488e-06	-1.22776	2.68974e-08	-1.6835	3.2953e-11	-1.63791	2.99845e-11	Mesenchymal
ANO1	-1.01383	3.64952e-05	-1.20334	1.31508e-06	-1.54468	1.16379e-08	-1.68642	1.37477e-09	Mesenchymal
FGF2	0.201828	0.0777918	-0.08014	0.482675	-0.0737359	0.504544	-0.409599	0.000358756	Mesenchymal
AACS	0.585229	1.78805e-05	0.469768	0.000128985	0.451366	0.000164147	0.389265	0.00072131	Endothelial
ACVRL1	0.0886806	0.414049	-0.159602	0.119676	-0.0368062	0.727178	-0.063035	0.532163	Endothelial
AK4	0.407776	0.00180876	0.904816	2.11261e-08	0.970575	2.79509e-09	1.11386	1.10807e-10	Endothelial
ACE	0.0338711	0.82267	-0.172709	0.191649	-0.128872	0.319403	-0.20197	0.111736	Endothelial
ADGRF5	0.228169	0.0343633	0.00876547	0.937855	0.0115847	0.917006	-0.0821881	0.4177	Endothelial
ADGRL2	0.0151335	0.895137	-0.161521	0.0946362	-0.120924	0.200794	-0.179025	0.0561957	Endothelial
ITGA2	0.963146	3.94459e-08	0.877575	2.88698e-08	0.954036	3.03466e-09	0.935489	2.7239e-09	Endothelial
AGPAT5	0.0831074	0.0857663	0.0460088	0.333258	0.147318	0.00204348	0.09388	0.0389325	Endothelial
APP	-0.0176249	0.886182	0.142708	0.171878	0.289356	0.00574046	0.418984	0.000137065	Endothelial
ANGPT2	0.478044	0.00049529	0.685813	2.50056e-06	0.990499	2.81871e-09	0.924639	6.33981e-09	Endothelial
AP3M1	0.111189	0.0287687	0.106583	0.0302491	0.106493	0.0273969	0.129761	0.00732218	Endothelial
AP4E1	0.167121	0.01615	0.163683	0.0149763	0.154573	0.0188588	0.242289	0.000420403	Endothelial
CPD	0.811347	7.53972e-05	0.836667	2.50931e-05	0.950393	2.79004e-06	0.865425	9.15695e-06	Endothelial
ARHGAP29	0.238573	0.0229297	0.112854	0.26604	-0.0725387	0.468809	-0.212423	0.0303872	Endothelial
ASAP2	-0.243687	0.0127993	-0.253678	0.00775856	-0.368906	0.000199236	-0.463227	7.96277e-06	Endothelial
MOV10	0.678851	1.84688e-07	0.713645	1.46761e-08	0.654124	3.34134e-08	0.686417	8.97559e-09	Endothelial
ARHGEF10	-0.25751	0.0179627	-0.383484	0.000542226	-0.379518	0.0004936	-0.323984	0.00205829	Endothelial
ARHGEF12	-0.129643	0.153335	-0.243401	0.00666479	-0.286579	0.00146058	-0.318183	0.000447248	Endothelial
ARRB1	-0.262305	0.00566214	-0.415583	3.29705e-05	-0.405498	3.47629e-05	-0.45061	6.18517e-06	Endothelial
ME3	0.0326442	0.688938	0.259542	0.000753456	0.473754	1.35665e-07	0.634705	3.93229e-10	Endothelial
BMP2K	0.10893	0.0630919	0.108548	0.0551873	0.189344	0.00116186	0.278154	9.19013e-06	Endothelial
BCAR1	0.038923	0.62291	0.130741	0.0684599	0.0758533	0.282156	0.0275313	0.70353	Endothelial
BCR	0.0864806	0.309416	0.127674	0.116508	0.0846211	0.289874	0.0662707	0.402839	Endothelial
ATP8B1	0.216482	0.0503545	0.414242	0.000303376	0.436458	0.000131449	0.543797	5.37578e-06	Endothelial
CADPS2	0.0202802	0.912229	0.11185	0.481251	-0.0501575	0.752272	-0.257933	0.0833751	Endothelial
MYO6	0.279055	0.0191805	0.41749	0.000579182	0.445497	0.000231123	0.537161	1.74248e-05	Endothelial
CDK17	-0.0403013	0.645731	-0.154186	0.0516888	-0.236537	0.00319975	-0.3001	0.000272167	Endothelial
CDKAL1	0.00359911	0.963657	-0.0959484	0.162212	-0.0933506	0.16252	-0.111027	0.0935883	Endothelial
CASP10	-0.0226617	0.780356	0.0126508	0.869171	0.0310715	0.667738	0.00196642	0.978315	Endothelial
NFAT5	-0.329776	0.00026737	-0.45668	1.77091e-06	-0.503404	2.37108e-07	-0.510051	1.34587e-07	Endothelial
NEDD4	-0.283467	2.09508e-06	-0.515128	1.16286e-11	-0.443696	9.78576e-11	-0.515339	2.30557e-12	Endothelial
ADAMTS4	-0.218492	0.118954	-0.386251	0.00545435	-0.322635	0.0165041	-0.519878	0.000241321	Endothelial
CMPK2	-0.329713	0.000230541	-0.496489	3.72388e-07	-0.485214	3.47992e-07	-0.479965	3.02685e-07	Endothelial
ARGLU1	-0.12799	0.22952	-0.274846	0.00849295	-0.434912	8.33775e-05	-0.522489	5.34198e-06	Endothelial
DDX60	-0.432722	1.18127e-06	-0.610715	7.25777e-10	-0.652877	8.57376e-11	-0.556802	1.07867e-09	Endothelial
CPNE2	-0.190472	0.00248403	-0.388964	1.5229e-07	-0.404458	4.40222e-08	-0.486941	8.86684e-10	Endothelial
CPNE8	-0.135025	0.0177524	-0.306474	2.21203e-06	-0.182141	0.00117111	-0.21335	0.000189953	Endothelial
MCF2L	-0.232503	0.0809265	-0.324188	0.0131026	-0.434326	0.00107698	-0.580584	3.15046e-05	Endothelial
CAV2	-0.190292	0.122382	-0.495094	0.000139186	-0.470864	0.000200352	-0.590482	8.18539e-06	Endothelial
COG4	0.135361	0.0107192	0.0860236	0.0879002	0.0939452	0.0575311	0.111568	0.0235228	Endothelial
IFIT3	-0.504348	0.00309755	-0.795684	1.2418e-05	-0.771529	1.37431e-05	-0.595193	0.000314943	Endothelial
CTNNAL1	-0.199949	0.0504263	-0.179654	0.0684362	-0.282991	0.0044634	-0.261145	0.00743134	Endothelial
CTNND1	-0.14591	0.063995	-0.242528	0.00214801	-0.319884	9.41869e-05	-0.382977	6.51082e-06	Endothelial
CTTNBP2NL	0.000122195	0.998326	-0.115723	0.0498689	-0.159616	0.00690765	-0.187511	0.00164847	Endothelial
FGD5	-0.465598	3.50476e-05	-0.557283	1.09976e-06	-0.695875	1.58411e-08	-0.628897	6.31906e-08	Endothelial
DECR2	0.160699	0.0196288	0.297632	5.06696e-05	0.389934	6.68615e-07	0.47814	1.26413e-08	Endothelial
EDNRB	-0.584703	0.000114261	-0.714437	3.80287e-06	-0.595953	3.6315e-05	-0.495384	0.00029678	Endothelial
DLL4	-0.0389822	0.830521	-0.239436	0.129429	-0.14356	0.356758	-0.242828	0.110903	Endothelial
DOCK6	-0.0024225	0.977752	-0.0556081	0.463424	-0.166968	0.0220074	-0.210237	0.00419448	Endothelial
DOCK9	-0.144548	0.107253	-0.361056	0.000137666	-0.427396	1.12582e-05	-0.455532	3.47271e-06	Endothelial
DPY19L3	-0.240386	0.00284257	-0.318413	0.000106591	-0.321419	7.3655e-05	-0.392201	3.59535e-06	Endothelial
DUSP23	0.252378	0.0126461	0.246309	0.0119887	0.287684	0.00327551	0.221503	0.0188825	Endothelial
DNASE1L3	-0.0645745	0.813822	-0.210333	0.391883	-0.185661	0.435584	-0.195885	0.402749	Endothelial
DYSF	0.00425525	0.965609	0.00865918	0.925398	0.127815	0.12617	0.126821	0.124747	Endothelial
ECE1	-0.107006	0.226045	-0.249411	0.00431534	-0.250335	0.00361786	-0.232396	0.00585951	Endothelial
NOC2L	0.167784	0.0329931	0.0778131	0.31109	0.0187655	0.813168	0.0790983	0.280457	Endothelial
NOS3	-0.1251	0.452293	-0.219135	0.162174	-0.349138	0.0240307	-0.435895	0.0050866	Endothelial
CEP135	-0.441868	0.030531	-0.449621	0.0232252	-0.44088	0.0232778	-0.637855	0.00136732	Endothelial
LUZP1	-0.0628742	0.302471	-0.200205	0.00108026	-0.266707	3.18282e-05	-0.367944	1.58765e-07	Endothelial
LYVE1	0.719859	0.0112627	0.847108	0.00250198	0.850335	0.00206352	0.393416	0.131641	Endothelial
MMRN1	-0.0350954	0.797489	0.000566225	0.996565	-0.245486	0.0364854	-0.461751	0.000215513	Endothelial
CAV1	-0.331163	0.010846	-0.588646	2.45546e-05	-0.517305	9.9968e-05	-0.657232	2.85391e-06	Endothelial
MOGS	0.076179	0.136938	0.0655368	0.187159	0.116179	0.0178318	0.157424	0.00165355	Endothelial
MON1B	0.0670744	0.253715	-0.00123579	0.982678	0.101666	0.0659275	0.141623	0.0108525	Endothelial
MAGI1	-0.248545	0.0204442	-0.230894	0.0256748	-0.344687	0.00113319	-0.403053	0.000185862	Endothelial
MYO18A	0.0175341	0.81145	0.108911	0.0909998	0.0329053	0.611677	0.0692603	0.266955	Endothelial
BCAM	-0.71219	0.000873494	-0.657126	0.0012232	-0.686534	0.000662733	-0.663627	0.00081836	Endothelial
MYZAP	-0.359727	0.0357914	-0.768693	3.27244e-05	-0.72401	5.52675e-05	-0.687153	8.89484e-05	Endothelial
MAN2C1	-0.172607	0.0165662	-0.130559	0.0582241	-0.164002	0.0164848	-0.146952	0.0287674	Endothelial
CRIP2	-0.409049	0.00248161	-0.413943	0.00154087	-0.52257	0.000102818	-0.77172	2.39345e-07	Endothelial
NES	-0.16162	0.124988	-0.384673	0.000417074	-0.589393	9.61691e-07	-0.82314	1.65519e-09	Endothelial
IDO1	-0.848912	0.00482666	-1.10672	0.000274792	-1.11628	0.000200352	-0.857866	0.00252661	Endothelial
KCTD12	-0.560034	8.87173e-06	-0.829088	4.74162e-09	-0.878524	7.34393e-10	-0.920541	1.70377e-10	Endothelial
MPDZ	-0.175273	0.0132202	-0.188632	0.00628838	-0.277769	0.000121483	-0.290092	5.95927e-05	Endothelial
CD109	-0.730951	9.19354e-09	-0.941758	9.67787e-12	-0.983076	2.02948e-12	-0.927377	2.2117e-12	Endothelial
CRMP1	-0.326886	0.0235291	-0.68747	1.40378e-05	-0.773774	1.66482e-06	-0.999457	1.34689e-08	Endothelial
LRCH1	-0.107536	0.0900763	-0.12467	0.0428448	-0.106648	0.0761334	-0.015091	0.810304	Endothelial
NFKB2	-0.0361142	0.546509	-0.265843	2.07707e-05	-0.330023	5.40263e-07	-0.369492	5.3528e-08	Endothelial
NFS1	-0.0541396	0.267792	0.00111214	0.981396	0.0840053	0.0671595	0.145511	0.00207722	Endothelial
EXOC6	-0.0343818	0.590362	-0.0078105	0.900846	-0.0273304	0.641445	0.0709118	0.206802	Endothelial
EXOC7	0.0695598	0.227282	0.0149208	0.802822	0.103572	0.0566447	0.142678	0.00908933	Endothelial
NASP	0.0142166	0.826567	-0.132824	0.0194099	-0.260596	2.68967e-05	-0.338067	3.72588e-07	Endothelial
LIG3	0.00265611	0.968371	-0.0961699	0.0993435	-0.142757	0.013916	-0.117709	0.0380692	Endothelial
MKL2	0.0292186	0.656589	-0.0805922	0.175048	-0.101549	0.0797768	-0.177116	0.00286239	Endothelial
MTUS1	0.0121777	0.939334	-0.0310506	0.827292	-0.0630729	0.634738	-0.148265	0.244136	Endothelial
LRRC8A	0.140956	0.0206137	0.065812	0.263449	0.0922715	0.105796	0.0844648	0.133752	Endothelial
CDH5	-0.496288	0.00750977	-0.811292	3.71774e-05	-0.951879	2.65907e-06	-1.23139	2.34142e-08	Endothelial
GMDS	0.335655	0.000422706	0.473721	2.53069e-06	0.492681	9.13637e-07	0.455102	2.54857e-06	Endothelial
CA4	-0.658254	6.76139e-05	-1.15339	4.83012e-09	-1.12122	3.80216e-09	-1.31085	1.08852e-10	Endothelial
NOSTRIN	-0.745579	3.78097e-07	-1.23939	7.29333e-12	-1.33961	6.82171e-13	-1.49639	2.55301e-14	Endothelial
COL15A1	-0.712398	0.00184403	-0.958241	4.56897e-05	-1.36031	1.53429e-07	-1.70576	1.57217e-09	Endothelial
GNL1	-0.00819576	0.896221	-0.0949311	0.0734334	-0.0824807	0.111431	-0.145221	0.00582252	Endothelial
MMRN2	-0.728838	0.000291851	-1.22473	9.14605e-08	-1.45839	2.15405e-09	-1.74018	3.86328e-11	Endothelial
ITGA3	-0.133048	0.0776165	-0.292143	0.00021246	-0.274537	0.000345397	-0.318291	4.87826e-05	Endothelial
ITGA5	0.277362	0.000496924	0.435577	6.08823e-07	0.389318	2.38414e-06	0.362132	5.72045e-06	Endothelial
ITGA6	-0.058522	0.431983	-0.0688498	0.33394	-0.0592313	0.392032	-0.0195848	0.783044	Endothelial
ITGB4	-0.012567	0.929251	0.108009	0.371723	0.072849	0.539223	0.134889	0.238965	Endothelial
ABCA3	-0.350625	0.000313939	-0.387458	5.4984e-05	-0.45369	4.39633e-06	-0.453796	3.45379e-06	Epithelial
ABCC4	-0.100555	0.117652	-0.236223	0.000385931	-0.231211	0.000395575	-0.217458	0.000654351	Epithelial
ACADL	-0.507889	0.000459839	-0.528869	0.000172031	-0.597239	2.90707e-05	-0.398101	0.0023065	Epithelial
DHCR24	0.722983	0.00032941	0.780495	7.66905e-05	1.14365	1.81459e-07	1.40027	3.04413e-09	Epithelial
ACSS3	-0.178904	0.0357231	-0.0201895	0.820114	0.127488	0.111436	0.32408	0.000169962	Epithelial
ALCAM	-0.108233	0.480498	0.216891	0.131702	0.225742	0.108135	0.347672	0.0138083	Epithelial
LMO7	0.647238	0.00567854	1.04247	2.64489e-05	1.20116	2.41325e-06	1.31141	4.36126e-07	Epithelial
ALDH3A1	0.299801	0.519233	1.26666	0.00437152	1.45339	0.00110739	1.23275	0.00423745	Epithelial
MACC1	0.566884	0.0002079	0.828041	5.31864e-07	0.861381	1.74373e-07	0.985716	1.03061e-08	Epithelial
ACAT2	0.828825	6.00178e-06	0.94706	2.26141e-07	1.00592	4.72645e-08	0.976067	5.37101e-08	Epithelial
AGR2	0.441565	0.0240314	0.344376	0.066842	-0.0131351	0.948874	-0.295615	0.103261	Epithelial
DSG2	0.705737	0.00261714	0.929202	0.0001004	0.856109	0.000209792	0.864807	0.00015894	Epithelial
AHCYL2	0.302432	0.0206434	0.253454	0.0435976	0.155166	0.20514	0.105026	0.389391	Epithelial
CLIC6	0.33336	0.0998181	0.763844	0.000292029	0.692412	0.000676191	0.699249	0.000532014	Epithelial
ARHGEF16	0.492451	0.000730423	0.547235	0.000137666	0.519884	0.000200352	0.614766	1.92412e-05	Epithelial
ALOX15B	-0.0342742	0.831799	-0.0106604	0.942712	-0.139317	0.313756	-0.162827	0.230405	Epithelial
ANK3	-0.257185	0.0477445	-0.159779	0.205039	-0.332494	0.00804274	-0.389349	0.00207476	Epithelial
AP1M2	0.0301124	0.862958	-0.013677	0.931976	-0.143351	0.3262	-0.133624	0.354616	Epithelial
ARFIP2	0.243178	0.00148952	0.129498	0.065425	0.0598628	0.388086	0.0544823	0.427607	Epithelial
ATP1B1	0.0151656	0.879897	-0.0185513	0.840936	0.0435773	0.609797	0.0878813	0.285546	Epithelial
ATP6V0A2	0.253039	0.00159537	0.219909	0.00376316	0.369616	8.58789e-06	0.463743	1.66999e-07	Epithelial
AGR3	-0.00993914	0.957349	0.451819	0.00543797	0.375238	0.0170634	0.560394	0.000583291	Epithelial
LIMD1	-0.295226	0.00248161	-0.382333	0.000112546	-0.406932	3.95543e-05	-0.509064	1.11612e-06	Epithelial
BSPRY	-0.0960051	0.35294	0.00655067	0.949432	-0.0640606	0.513204	-0.0484592	0.619923	Epithelial
C2orf54	-0.320242	0.0690528	-0.278164	0.101973	-0.146939	0.382078	0.0193256	0.911344	Epithelial
C4BPA	-0.0505503	0.805367	-0.0494521	0.798454	-0.203038	0.249587	-0.195997	0.259104	Epithelial
C6	-0.206481	0.111757	-0.134194	0.291239	-0.20396	0.0969626	-0.304526	0.013581	Epithelial
C6orf132	0.133252	0.440489	0.315597	0.0524815	0.1592	0.319159	0.13294	0.400973	Epithelial
AQP4	-0.505165	0.00132155	-0.527813	0.000561905	-0.584542	0.000143348	-0.542524	0.000293145	Epithelial
CAP2	-0.330401	0.019304	-0.216783	0.10911	-0.383235	0.00497546	-0.5839	5.69219e-05	Epithelial
CA2	-0.442135	0.012455	-0.510888	0.00331729	-0.401989	0.0163137	-0.629606	0.000323543	Epithelial
CAPS	-0.213512	0.768017	0.662494	0.302707	0.441386	0.485351	0.114121	0.862197	Epithelial
C2	-0.0854967	0.440639	0.162645	0.119103	-0.00891498	0.937106	0.0827673	0.416506	Epithelial
CDH1	0.0313611	0.864485	0.213254	0.173938	0.094488	0.546223	0.152294	0.314583	Epithelial
CP	-0.378062	0.0364061	-0.367037	0.0357372	-0.506194	0.00400844	-0.645429	0.000348668	Epithelial
CDC42BPG	0.313596	0.0117665	0.406375	0.00109468	0.328583	0.00584765	0.327682	0.00539821	Epithelial
CHDH	-0.128743	0.0681677	-0.0471692	0.504094	0.117032	0.0797075	0.241331	0.000577464	Epithelial
CLIC3	-0.0371925	0.842447	0.187247	0.248564	0.14325	0.36894	0.187701	0.228477	Epithelial
CLIC5	-0.64421	0.000780279	-0.792899	4.22616e-05	-0.718009	0.000112765	-0.698917	0.000134385	Epithelial
CTSH	-0.546549	0.000445509	-0.581121	0.000130762	-0.79627	1.13034e-06	-0.7283	3.59429e-06	Epithelial
CGN	-0.167987	0.267511	-0.114876	0.441846	-0.184645	0.193385	-0.0797075	0.579369	Epithelial
CACNA2D2	-0.45568	0.00128785	-0.610412	2.77418e-05	-0.722074	1.71173e-06	-0.757284	5.93592e-07	Epithelial
CPM	-0.0416256	0.630322	-0.114429	0.145459	-0.110305	0.149088	-0.0804442	0.289297	Epithelial
COL4A3	-0.459531	0.386315	-0.38113	0.462164	-0.590919	0.231678	-0.205254	0.684968	Epithelial
COL7A1	0.304774	0.0866083	0.0913892	0.612838	-0.0791545	0.648591	-0.170122	0.307389	Epithelial
CRYM	-0.444208	0.00571829	-0.410355	0.00787465	-0.696948	2.89947e-05	-0.792892	3.53056e-06	Epithelial
ALDH1A1	-0.506644	6.11698e-05	-0.630545	1.23624e-06	-0.632865	7.59621e-07	-0.817322	5.56881e-09	Epithelial
CXADR	-0.170069	0.117202	-0.124811	0.237155	-0.0756314	0.469073	-0.0914863	0.371028	Epithelial
DDAH1	0.0565516	0.645182	0.268696	0.0164411	0.239759	0.0282371	0.174726	0.10242	Epithelial
ALDH3B1	-0.764075	4.03303e-05	-0.793396	1.11695e-05	-0.84941	2.75658e-06	-0.829508	3.19675e-06	Epithelial
CYB5A	-0.245549	0.0410069	-0.250142	0.0317679	-0.320981	0.00585529	-0.293331	0.0101743	Epithelial
CYP2S1	-0.324337	0.00207861	-0.0698049	0.486906	0.0803527	0.402806	0.310543	0.00160911	Epithelial
DLG3	-0.115342	0.0678389	-0.106429	0.080851	-0.215413	0.000678958	-0.258181	7.31054e-05	Epithelial
CD38	-0.553507	1.45241e-06	-0.722355	3.96419e-09	-1.00612	3.25725e-12	-1.11788	2.15734e-13	Epithelial
DNAJA4	-0.18074	0.280401	-0.0417855	0.80951	-0.115596	0.468846	-0.279187	0.0722458	Epithelial
NEBL	-0.592783	4.40635e-05	-0.90024	3.27085e-08	-1.05553	8.54758e-10	-1.18434	4.9407e-11	Epithelial
LZTFL1	0.0648477	0.462159	0.125698	0.129871	0.0975128	0.231027	0.0118085	0.890765	Epithelial
AZGP1	-0.385022	0.318413	0.069044	0.862445	-0.745517	0.0396203	-1.22057	0.00111901	Epithelial
AGER	-1.70915	6.299e-07	-2.21826	1.42297e-09	-2.43857	9.79284e-11	-2.5893	1.53443e-11	Epithelial
MYO5A	0.0815498	0.43388	0.257445	0.00997114	0.302724	0.00245497	0.420608	6.19596e-05	Epithelial
MYO5B	0.168755	0.16376	0.317471	0.00789423	0.261626	0.0239371	0.303402	0.00873445	Epithelial
MYO5C	-0.112036	0.342139	-0.167318	0.136329	-0.238573	0.0309365	-0.145491	0.178938	Epithelial
MAP7	0.261997	0.0779478	0.408203	0.00559756	0.343867	0.0160056	0.265089	0.057261	Epithelial
NT5DC1	0.206307	0.0160511	0.233607	0.00542119	0.224599	0.00634804	0.161528	0.0423272	Epithelial
MAPRE3	0.121174	0.143526	0.273638	0.00111776	0.284295	0.000634359	0.233878	0.00346833	Epithelial
MPP7	0.0659974	0.584587	0.336197	0.00310026	0.21837	0.0436478	0.236144	0.0278103	Epithelial
MCCC2	-0.144831	0.00806409	-0.10635	0.0407641	0.0231381	0.659666	0.104915	0.0372966	Epithelial
APOH	-1.49858	2.61218e-05	-2.54663	1.93433e-09	-2.78331	1.4835e-10	-2.92587	3.27717e-11	Epithelial
