# Supplementary material
Source: HighWire-hosted journal article supplement (https://erj.ersjournals.com/content/58/1/2000221)
Supplement: inline-supplementary-material-6 [file inline-supplementary-material-6.xlsx]

## Sheet: Significant-Cell-Type
	D04-D01 LogFC	D07-D01 LogFC	D10-D01 LogFC	D13-D1 LogFC	Cell-type
ACP5	0.351679	0.669319	1.2402	1.573	Immune
CTSB	0.277631	0.878158	0.955661	1.30768	Immune
NEU1	0.901434	1.11498	1.19794	1.27612	Immune
CAPG	0.241998	0.66066	0.971609	1.26253	Immune
CSTB	0.227545	0.66091	0.90679	1.17361	Immune
CTSS	0.294892	0.532698	0.627278	0.959935	Immune
BCAT1	0.103051	0.451842	0.641568	0.956871	Immune
ANPEP	0.4732	0.582076	0.723756	0.945214	Immune
CTSD	0.338496	0.687717	0.788606	0.937092	Immune
CYP27A1	0.0773028	0.262596	0.675702	0.927862	Immune
MANBA	0.263181	0.630003	0.74156	0.877493	Immune
MAN2B1	0.347934	0.661482	0.727916	0.869678	Immune
APOE	0.147121	0.321217	0.560978	0.813411	Immune
MYO1G	0.0901906	0.445858	0.507545	0.754037	Immune
CYBB	0.116889	0.308487	0.492434	0.739842	Immune
ATP6V1F	0.236572	0.441363	0.65364	0.73623	Immune
C5AR1	0.170835	0.189424	0.436123	0.688264	Immune
MAN2B2	0.147809	0.526893	0.593997	0.66106	Immune
ATP6V0D1	0.138088	0.340691	0.510836	0.65042	Immune
ACOT8	0.181791	0.370688	0.488231	0.612086	Immune
CCDC88A	0.0481677	0.218556	0.312608	0.567417	Immune
CYBA	0.127843	0.226771	0.402787	0.554554	Immune
CD163	0.404318	0.707689	0.506913	0.547915	Immune
ARAP1	0.241641	0.334606	0.3901	0.545452	Immune
CPVL	-0.516084	-0.54172	-0.555176	-0.546181	Immune
LMNB1	-0.421194	-0.466736	-0.519153	-0.584051	Immune
ALOX5	-0.366831	-0.633071	-0.611837	-0.646423	Immune
BAZ1A	-0.430742	-0.660769	-0.795594	-0.815317	Immune
CD274	-0.554522	-0.973056	-0.973747	-1.04395	Immune
CD14	-0.099702	-0.438774	-0.875741	-1.05613	Immune
CORO1A	-0.875391	-0.991731	-1.10011	-1.11992	Immune
CRIP1	-0.61069	-0.730209	-0.890026	-1.13329	Immune
MNDA	-0.808603	-1.07959	-1.20132	-1.27981	Immune
MMP14	1.25089	1.48874	2.07582	2.27315	Mesenchymal
MMP2	1.30555	1.71116	2.00682	2.10871	Mesenchymal
ANGPTL2	1.08688	1.588	1.72382	1.67106	Mesenchymal
C1S	1.04082	1.39136	1.3368	1.54231	Mesenchymal
MFGE8	0.25607	0.916915	1.21005	1.35195	Mesenchymal
DFNA5	0.482306	0.858175	1.11187	1.30832	Mesenchymal
BMP1	0.517453	1.01295	1.00887	1.20213	Mesenchymal
C1R	0.753361	1.1413	1.03689	1.17725	Mesenchymal
MXRA8	0.728141	0.851925	1.13307	1.11816	Mesenchymal
MME	0.0205821	0.211455	0.755951	1.06581	Mesenchymal
DDR2	0.154787	0.337693	0.858304	1.02187	Mesenchymal
ANTXR1	0.539185	0.600296	0.89169	0.907756	Mesenchymal
CYP1B1	0.348557	0.385348	0.6785	0.833677	Mesenchymal
LRP1	0.413836	0.612884	0.615231	0.596779	Mesenchymal
MAP1B	0.476473	0.748951	0.656942	0.591764	Mesenchymal
MTHFD1L	0.22755	0.28522	0.352019	0.561441	Mesenchymal
CTSF	0.0776301	0.366521	0.415871	0.550752	Mesenchymal
NNT	0.0579636	0.202453	0.340016	0.504098	Mesenchymal
LUM	-0.253616	0.0985974	-0.241308	-0.500569	Mesenchymal
COL6A6	-0.180572	-0.380093	-0.395988	-0.51512	Mesenchymal
CDH13	-0.292469	-0.381158	-0.364731	-0.535712	Mesenchymal
MECP2	-0.214923	-0.265084	-0.318505	-0.535714	Mesenchymal
ARHGEF17	-0.270835	-0.291089	-0.412708	-0.537465	Mesenchymal
ARHGAP42	-0.266149	-0.435099	-0.535065	-0.553217	Mesenchymal
COL6A5	-0.228744	-0.522154	-0.445667	-0.571199	Mesenchymal
NID1	-0.291133	-0.476368	-0.511988	-0.576698	Mesenchymal
DPYSL3	-0.294527	-0.287246	-0.442822	-0.584505	Mesenchymal
MACF1	-0.365882	-0.467105	-0.559996	-0.630977	Mesenchymal
CSPG4	-0.202233	-0.297657	-0.48325	-0.659576	Mesenchymal
COL5A1	-0.483577	-0.409403	-0.624974	-0.686127	Mesenchymal
MAMDC2	-0.412188	-0.443118	-0.550947	-0.686264	Mesenchymal
CALD1	-0.360518	-0.142437	-0.444332	-0.707313	Mesenchymal
CORO2B	-0.295365	-0.42525	-0.533021	-0.717231	Mesenchymal
EFEMP1	-0.437525	-0.357822	-0.641611	-0.782083	Mesenchymal
A2M	-0.744806	-0.941726	-0.858884	-0.784394	Mesenchymal
COL14A1	-0.247876	0.416882	-0.213814	-0.827091	Mesenchymal
MAOB	-0.441749	-0.650252	-0.671657	-0.837939	Mesenchymal
COL3A1	-0.160026	-0.0557896	-0.827906	-0.851232	Mesenchymal
DMD	-0.504659	-0.121473	-0.519035	-0.877386	Mesenchymal
AKAP12	-0.579448	-0.540393	-0.679614	-0.895246	Mesenchymal
DAAM2	-0.530239	-0.657729	-0.766132	-0.911739	Mesenchymal
MYL9	-0.492104	-0.231722	-0.518138	-0.932614	Mesenchymal
LDB3	-0.640435	-0.379175	-0.504957	-0.987004	Mesenchymal
NEXN	-0.62221	-0.707664	-0.890939	-0.994207	Mesenchymal
AOC3	-0.417969	-0.647011	-0.771259	-1.00344	Mesenchymal
MYLK	-0.663873	-0.616769	-0.839953	-1.00494	Mesenchymal
CNN1	-0.582193	0.100102	-0.464957	-1.00818	Mesenchymal
ABCA8	-0.706019	-0.765022	-0.985175	-1.07988	Mesenchymal
ADARB1	-0.644185	-0.836913	-0.936856	-1.1141	Mesenchymal
MRVI1	-0.661196	-0.448391	-0.818778	-1.1214	Mesenchymal
MYH11	-0.469872	-0.05168	-0.465625	-1.16845	Mesenchymal
MYH10	-0.537733	-0.601862	-0.918373	-1.19083	Mesenchymal
ASPA	-0.653008	-0.896033	-0.994408	-1.22271	Mesenchymal
ADH1B	-0.606289	-0.826602	-0.958199	-1.29579	Mesenchymal
LSAMP	-0.879225	-1.18632	-1.26039	-1.2985	Mesenchymal
DES	-0.428481	-0.0342192	-0.670591	-1.31912	Mesenchymal
CA3	-0.635497	-0.776581	-1.06119	-1.46908	Mesenchymal
CSRP1	-0.758938	-0.853396	-1.08446	-1.47565	Mesenchymal
LMOD1	-0.916085	-0.709588	-1.24228	-1.60764	Mesenchymal
CFD	-0.96551	-1.22776	-1.6835	-1.63791	Mesenchymal
ANO1	-1.01383	-1.20334	-1.54468	-1.68642	Mesenchymal
AK4	0.407776	0.904816	0.970575	1.11386	Endothelial
ITGA2	0.963146	0.877575	0.954036	0.935489	Endothelial
ANGPT2	0.478044	0.685813	0.990499	0.924639	Endothelial
CPD	0.811347	0.836667	0.950393	0.865425	Endothelial
MOV10	0.678851	0.713645	0.654124	0.686417	Endothelial
ME3	0.0326442	0.259542	0.473754	0.634705	Endothelial
ATP8B1	0.216482	0.414242	0.436458	0.543797	Endothelial
MYO6	0.279055	0.41749	0.445497	0.537161	Endothelial
NFAT5	-0.329776	-0.45668	-0.503404	-0.510051	Endothelial
NEDD4	-0.283467	-0.515128	-0.443696	-0.515339	Endothelial
ADAMTS4	-0.218492	-0.386251	-0.322635	-0.519878	Endothelial
ARGLU1	-0.12799	-0.274846	-0.434912	-0.522489	Endothelial
DDX60	-0.432722	-0.610715	-0.652877	-0.556802	Endothelial
MCF2L	-0.232503	-0.324188	-0.434326	-0.580584	Endothelial
CAV2	-0.190292	-0.495094	-0.470864	-0.590482	Endothelial
IFIT3	-0.504348	-0.795684	-0.771529	-0.595193	Endothelial
FGD5	-0.465598	-0.557283	-0.695875	-0.628897	Endothelial
CEP135	-0.441868	-0.449621	-0.44088	-0.637855	Endothelial
CAV1	-0.331163	-0.588646	-0.517305	-0.657232	Endothelial
BCAM	-0.71219	-0.657126	-0.686534	-0.663627	Endothelial
MYZAP	-0.359727	-0.768693	-0.72401	-0.687153	Endothelial
CRIP2	-0.409049	-0.413943	-0.52257	-0.77172	Endothelial
NES	-0.16162	-0.384673	-0.589393	-0.82314	Endothelial
IDO1	-0.848912	-1.10672	-1.11628	-0.857866	Endothelial
KCTD12	-0.560034	-0.829088	-0.878524	-0.920541	Endothelial
CD109	-0.730951	-0.941758	-0.983076	-0.927377	Endothelial
CRMP1	-0.326886	-0.68747	-0.773774	-0.999457	Endothelial
CDH5	-0.496288	-0.811292	-0.951879	-1.23139	Endothelial
CA4	-0.658254	-1.15339	-1.12122	-1.31085	Endothelial
NOSTRIN	-0.745579	-1.23939	-1.33961	-1.49639	Endothelial
COL15A1	-0.712398	-0.958241	-1.36031	-1.70576	Endothelial
MMRN2	-0.728838	-1.22473	-1.45839	-1.74018	Endothelial
DHCR24	0.722983	0.780495	1.14365	1.40027	Epithelial
LMO7	0.647238	1.04247	1.20116	1.31141	Epithelial
ALDH3A1	0.299801	1.26666	1.45339	1.23275	Epithelial
MACC1	0.566884	0.828041	0.861381	0.985716	Epithelial
ACAT2	0.828825	0.94706	1.00592	0.976067	Epithelial
DSG2	0.705737	0.929202	0.856109	0.864807	Epithelial
CLIC6	0.33336	0.763844	0.692412	0.699249	Epithelial
ARHGEF16	0.492451	0.547235	0.519884	0.614766	Epithelial
AGR3	-0.00993914	0.451819	0.375238	0.560394	Epithelial
LIMD1	-0.295226	-0.382333	-0.406932	-0.509064	Epithelial
AQP4	-0.505165	-0.527813	-0.584542	-0.542524	Epithelial
CAP2	-0.330401	-0.216783	-0.383235	-0.5839	Epithelial
CA2	-0.442135	-0.510888	-0.401989	-0.629606	Epithelial
CP	-0.378062	-0.367037	-0.506194	-0.645429	Epithelial
CLIC5	-0.64421	-0.792899	-0.718009	-0.698917	Epithelial
CTSH	-0.546549	-0.581121	-0.79627	-0.7283	Epithelial
CACNA2D2	-0.45568	-0.610412	-0.722074	-0.757284	Epithelial
CRYM	-0.444208	-0.410355	-0.696948	-0.792892	Epithelial
ALDH1A1	-0.506644	-0.630545	-0.632865	-0.817322	Epithelial
ALDH3B1	-0.764075	-0.793396	-0.84941	-0.829508	Epithelial
CD38	-0.553507	-0.722355	-1.00612	-1.11788	Epithelial
NEBL	-0.592783	-0.90024	-1.05553	-1.18434	Epithelial
AZGP1	-0.385022	0.069044	-0.745517	-1.22057	Epithelial
AGER	-1.70915	-2.21826	-2.43857	-2.5893	Epithelial
APOH	-1.49858	-2.54663	-2.78331	-2.92587	Epithelial
